# Supplementary material for: High-density microprojection array delivery to rat skin of low doses of trivalent inactivated poliovirus vaccine elicits potent neutralising antibody responses
Source: PubMed Central journal article supplement (PMC5626768; doi:10.1038/s41598-017-13011-0), 2017-10-03
Supplement: 41598_2017_13011_MOESM1_ESM.pdf [file 41598_2017_13011_MOESM1_ESM.pdf]

**Title: High-density microprojection array delivery to rat skin of low doses of trivalent inactivated poliovirus vaccine elicits potent neutralising antibody responses.**

Authors Names and affiliations:

Authors Names and affiliations:

David A. Muller<sup>1,2,4\*</sup>, Germain J.P. Fernando<sup>1,3</sup>, Nick S. Owens<sup>1</sup>, Christiana Agyei-Yeboah<sup>1</sup>, Jonathan C. J. Wei<sup>1</sup>, Alexandra C.I. Depelseñaire<sup>1</sup>, Angus Forster<sup>5</sup>, Paul Fahey<sup>5</sup>, William C. Weldon<sup>6</sup>, M. Steven Oberste<sup>6</sup>, Paul R. Young<sup>2,4</sup>, Mark A. F. Kendall<sup>1,2,3\*</sup>.

<sup>1</sup>Delivery of Drugs and Genes Group (D2G2) Australian Institute for Bioengineering and Nanotechnology, The University of Queensland, Brisbane, Queensland QLD 4072, Australia.

<sup>2</sup>Australian Infectious Diseases Research Centre, The University of Queensland, Brisbane, Queensland, Australia.

<sup>3</sup>ARC Centre of Excellence in Convergent Bio-Nano Science and Technology, Queensland, Australia

<sup>4</sup>School of Chemistry and Molecular Biosciences, The University of Queensland, Brisbane, Queensland, Australia.

<sup>5</sup>Vaxxas Pty Ltd, Translational Research Institute, Brisbane, Queensland 4102, Australia.

<sup>6</sup>Division of Viral Diseases, National Center for Immunization and Respiratory Diseases, Centers for Disease Control and Prevention, Atlanta, Georgia, USA.

\*To Whom Correspondence can be addressed:

Dr David A Muller

Address: The University of Queensland, Australian Institute for Bioengineering and Nanotechnology, Building 75, St Lucia, Queensland, 4072, Australia.

Email: [d.muller4@uq.edu.au](mailto:d.muller4@uq.edu.au) Tel: +61 7 3365 4881 Fax: +61 7 3346 4197

**Supplementary information:**

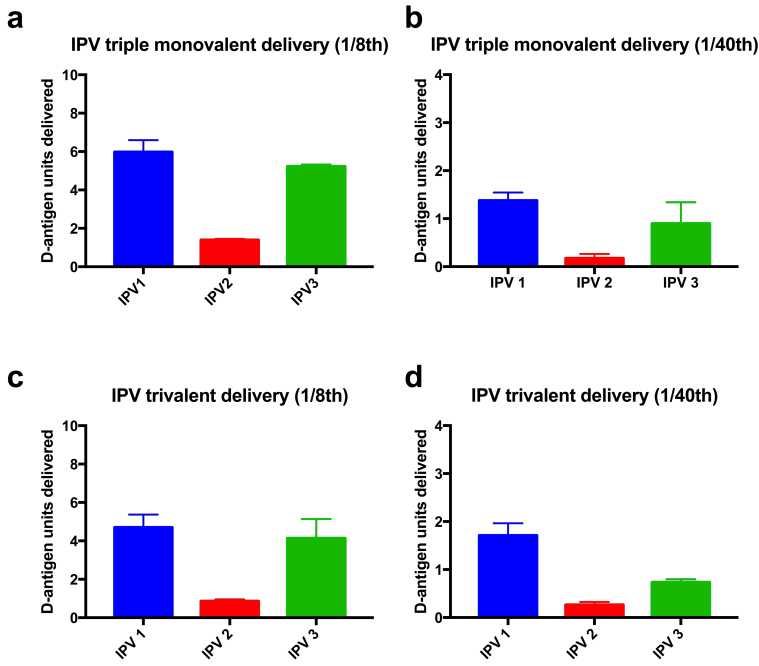

**Figure S1:** IPV delivered by Nanopatch into the ear of wistar rats as determined by D-antigen ELISA. Triple monovalent Nanopatch delivery of (a) 1/8<sup>th</sup> or (b) 1/40<sup>th</sup> IPV fraction doses. Trivalent Nanopatch delivery of (c) 1/8<sup>th</sup> or (d) 1/40<sup>th</sup> IPV fraction doses.

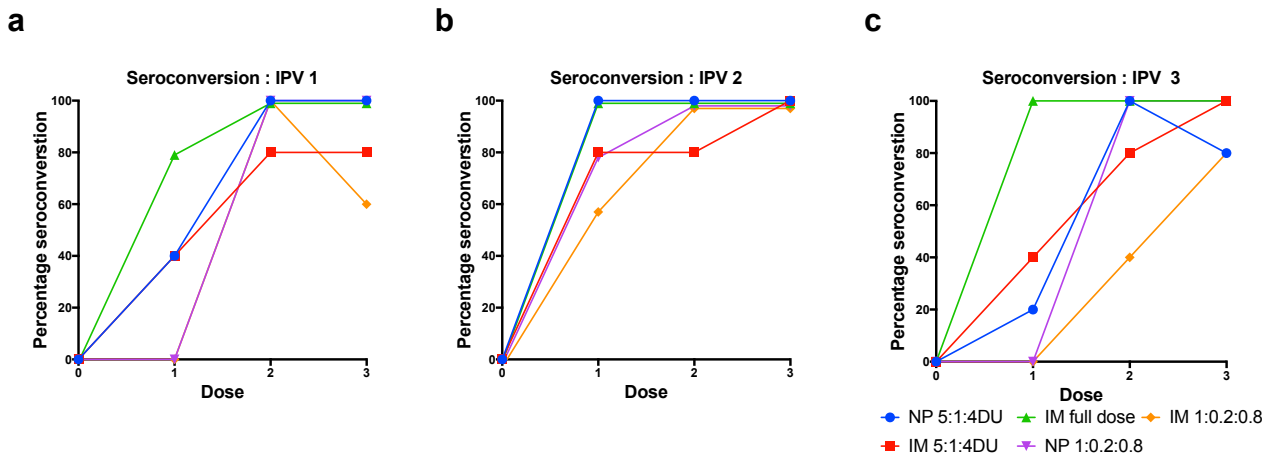

**Figure S2.** Seroconversion of each group in the triple monovalent study to (a) IPV1, (b) IPV2 and (c) IPV3. Seroconversion percentage corresponds with data presented in **Figure 2a-c**.

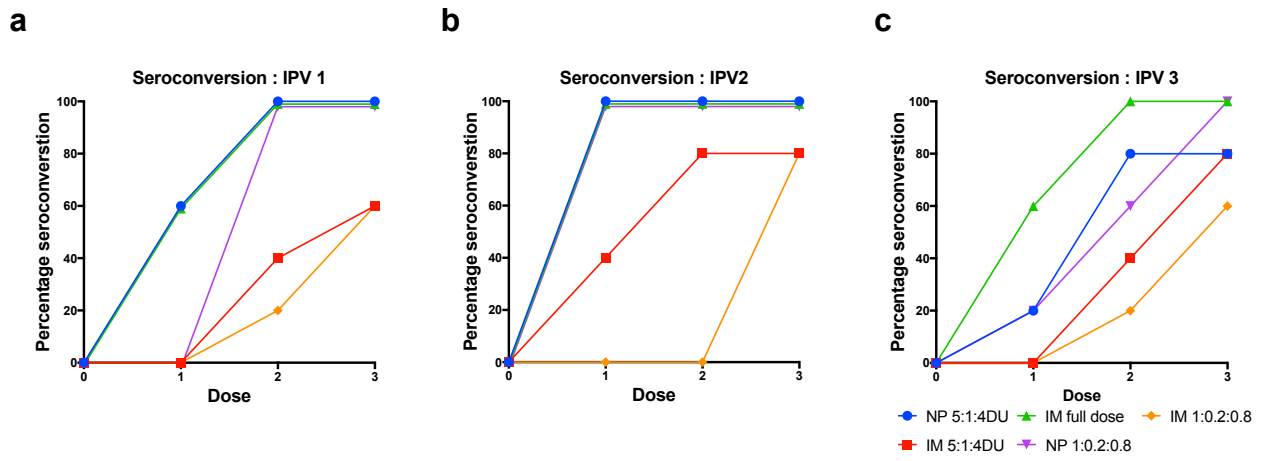

**Figure S3.** Seroconversion of each group in the trivalent study to (a) IPV1, (b) IPV2 and (c) IPV3.

Seroconversion percentage corresponds with data presented in **Figure 4a-c**.
